# Supplementary material
Source: PubMed Central journal article supplement (PMC3989639)
Supplement: embj0033-0312-sd1.pdf [file embj0033-0312-sd1.pdf]

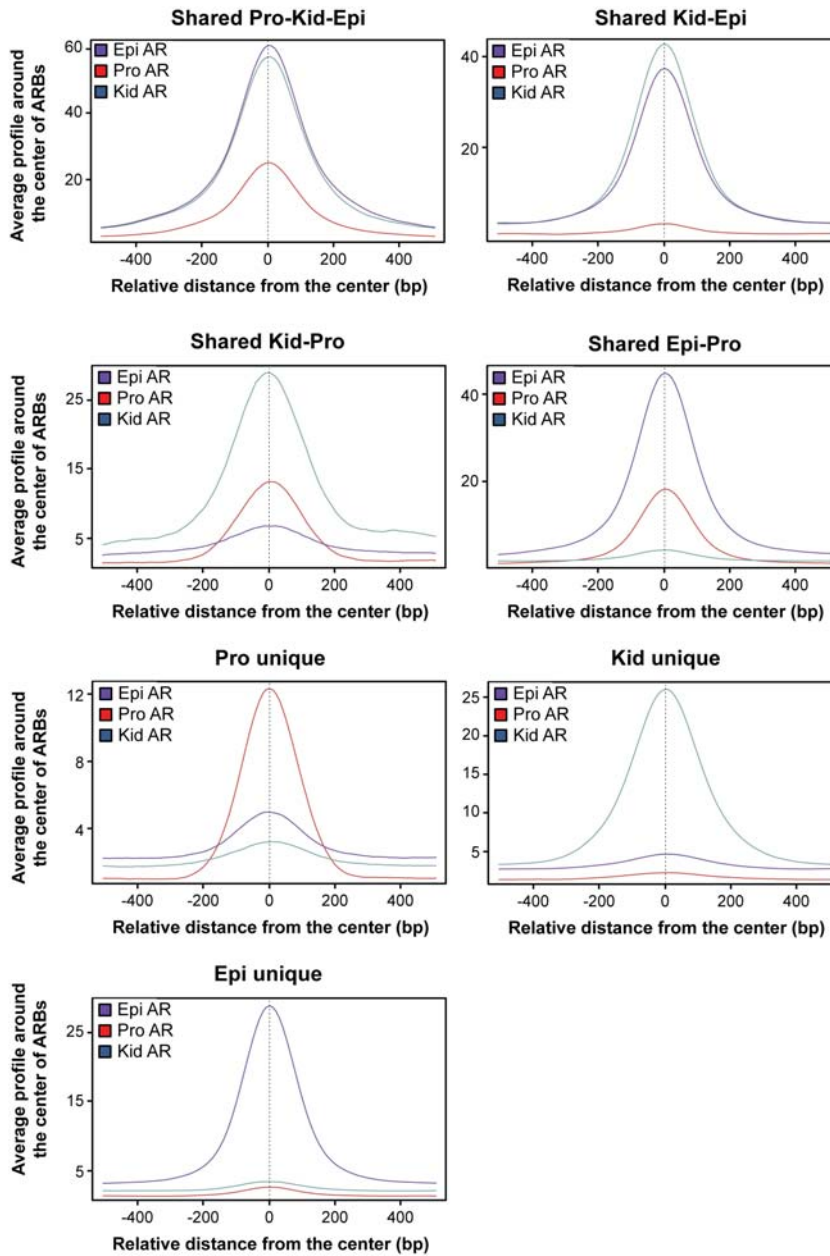

**Supplementary Figure S1.** Average tag density profiles of AR ChIP-seq reads for receptor-binding events unique to prostate, kidney or epididymis and for those shared in two or three tissues.
