# Supplementary material
Source: PubMed Central journal article supplement (PMC3989639)
Supplement: embj0033-0312-sd5.pdf [file embj0033-0312-sd5.pdf]

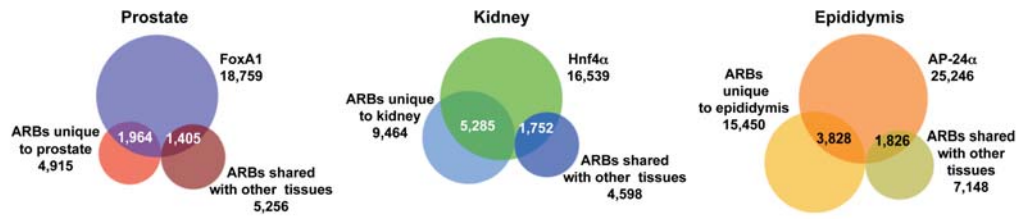

**Supplementary Figure S5.** Area-proportional Venn diagrams depicting unique and shared AR cistromes that overlap with the FoxA1 cistrome in prostate, the Hnf4α cistrome in kidney and the AP-2α cistrome in caput epididymis (FDR<2%).
