# Supplementary material
Source: PubMed Central journal article supplement (PMC3989639)
Supplement: embj0033-0312-sd7.pdf [file embj0033-0312-sd7.pdf]

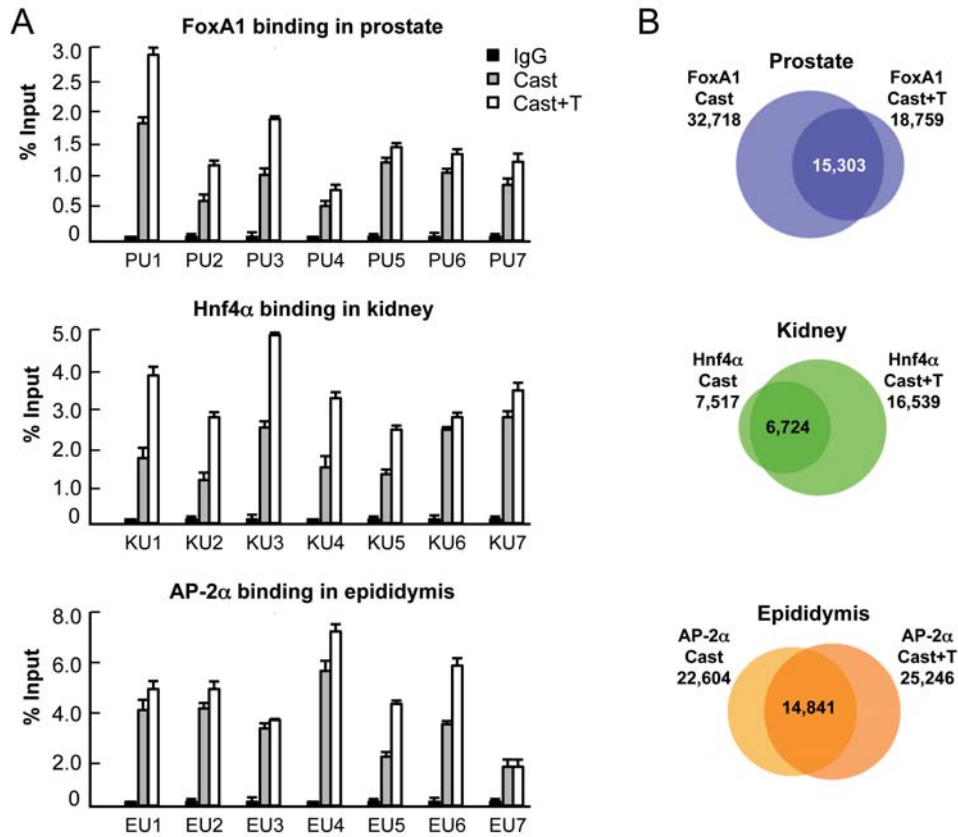

**Supplementary Figure S7.** A, ChIP-qPCR validation of binding sites for FoxA1 in prostate, Hnf4 $\alpha$  in kidney and AP-2 $\alpha$  in epididymis of castrated vehicle- and T-treated mice. B, Overlap of binding events under castrated and T-treated conditions for FoxA1 in prostate, Hnf4 $\alpha$  in kidney, and AP-2 $\alpha$  in epididymis. Castrated numbers are based on one replicate, Cast+T numbers on two biological replicates.
