# Supplementary material
Source: PubMed Central journal article supplement (PMC3989639)
Supplement: embj0033-0312-sd17.pdf [file embj0033-0312-sd17.pdf]

**Table S6.** ChIP-seq reads.

| <b>Sample</b>                | <b>Number of reads after filtering in MACS</b> |
|------------------------------|------------------------------------------------|
| Prostate AR Cast             | 7,007,153                                      |
| Prostate AR Cast+T rep1      | 20,712,551                                     |
| Prostate AR Cast+T rep2      | 12,733,472                                     |
| Prostate FoxA1 Cast          | 12,028,484                                     |
| Prostate FoxA1 Cast+T rep1   | 10,941,267                                     |
| Prostate FoxA1 Cast+T rep2   | 11,430,057                                     |
| Prostate Hnf4a Cast+T        | 25,955,508                                     |
| Prostate AP-2a Cast+T        | 19,191,241                                     |
| Prostate rabbit IgG          | 15,577,443                                     |
| Prostate mouse IgG           | 26,122,718                                     |
| Kidney AR Cast               | 13,606,470                                     |
| Kidney AR Cast+T rep1        | 26,582,496                                     |
| Kidney AR Cast+T rep2        | 26,494,376                                     |
| Kidney FoxA1 Cast+T          | 21,954,984                                     |
| Kidney Hnf4a Cast            | 31,377,742                                     |
| Kidney Hnf4a Cast+T rep1     | 29,405,902                                     |
| Kidney AP-2a Cast+T          | 22,914,994                                     |
| Kidney rabbit IgG            | 31,546,507                                     |
| Kidney mouse IgG             | 29,699,348                                     |
| Epididymis AR Cast           | 4,916,894                                      |
| Epididymis AR Cast+T rep1    | 33,332,063                                     |
| Epididymis AR Cast+T rep2    | 24,434,968                                     |
| Epididymis FoxA1 Cast+T      | 17,628,286                                     |
| Epididymis Hnf4a Cast+T      | 26,343,735                                     |
| Epididymis AP-2a Cast        | 12,208,407                                     |
| Epididymis AP-2a Cast+T rep1 | 24,437,855                                     |
| Epididymis AP-2a Cast+T rep2 | 27,472,348                                     |
| Epididymis rabbit IgG        | 26,966,766                                     |
| Epididymis mouse IgG         | 26,873,515                                     |
| Prostate H3K4me1             | 28,394,698                                     |
| Prostate H3K27ac             | 29,080,354                                     |
| Kidney H3K4me1               | 30,402,227                                     |
| Kidney H3K27ac               | 27,993,208                                     |
| Epididymis H3K4me1           | 28,633,270                                     |
| Epididymis H3K27ac           | 29,444,384                                     |
