# Supplementary material
Source: PubMed Central journal article supplement (PMC3989639)

Source data for Figure 7.

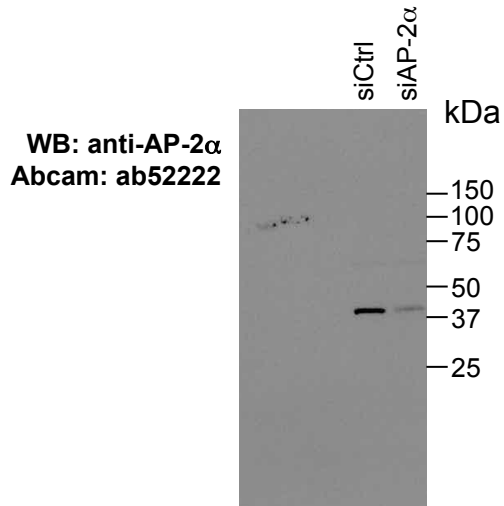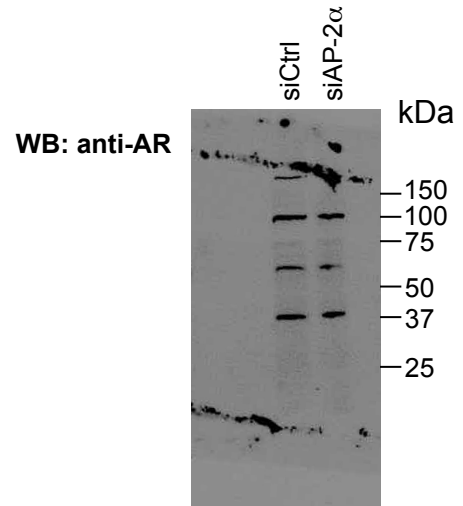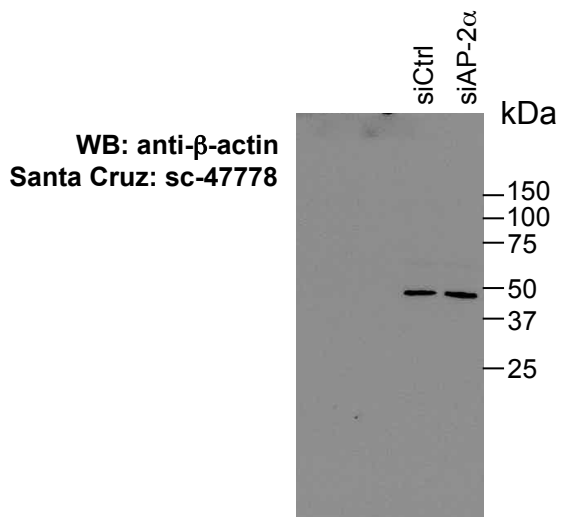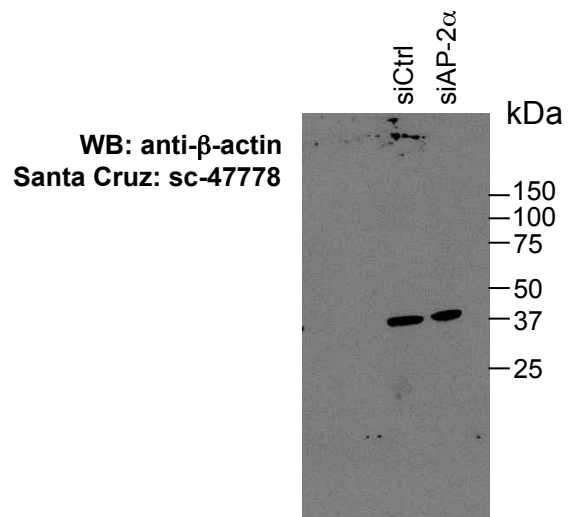

Supplement: embj0033-0312-sd22.pdf [file embj0033-0312-sd22.pdf]
